# Supplementary material
Source: Springer Nature journal article supplement (http://www.nature.com/nature/journal/v437/n7058/extref/437477a-s1.pdf)
Supplement: 437477a-s1.pdf [file 437477a-s1.pdf]

Co-authors are Donat Agosti of the American Museum of Natural History, New York; Miguel Alonso-Zarazaga of the International Commission on Zoological Nomenclature (ICZN), and the National Museum of Natural History, Madrid; George Beccaloni of the Natural History Museum, London; Per de Place Bjørn of the Global Biodiversity Information Facility, Copenhagen; Philippe Bouchet of the ICZN, and the National Museum of Natural History in Paris; Denis J. Brothers of the ICZN, and the University of KwaZulu-Natal, Pietermaritzburg, South Africa; the Earl of Cranbrook of the International Trust for Zoological Nomenclature, London; Neal Evenhuis of the Bishop Museum, Honolulu; H. Charles J. Godfray of Imperial College London, UK; Norman F. Johnson of the Ohio State University, Columbus, Ohio; Frank-Thorsten Krell of the Natural History Museum, London; Diana Lipscomb of the George Washington University, USA; Christopher H. C. Lyal of the Natural History Museum, London; Georgina M. Mace of the Zoological Society of London, UK; Shunsuke Mawatari of the ICZN, and of Hokkaido University, Japan; Scott E. Miller of the Smithsonian Institution, Washington DC; Alessandro Minelli of the ICZN, and of the University of Padova, Italy; Solene Morris of the ICZN; Peter K. L. Ng of the ICZN, and of the Raffles Museum of Biodiversity Research, Singapore; David J. Patterson of the ICZN, and of the Marine Biological Laboratory, Woods Hole, Massachusetts; Richard L. Pyle of the Bishop Museum, Honolulu; Nigel Robinson of Thomson Zoological Ltd, York, UK; Lucie Rogo of BioNet International; Janice Taverne of the International Trust for Zoological Nomenclature, London; F. Christian Thompson of the Smithsonian Institution, Washington DC; Jan van Tol of the ICZN, and the National Museum of Natural History, Leiden, The Netherlands; Quentin D. Wheeler of the Natural History Museum, London; and Edward O. Wilson of Harvard University, Cambridge, Massachusetts.
